# Supplementary material
Source: PubMed Central journal article supplement (PMC11385735)
Supplement: PBI-19-2082-s001.pdf [file PBI-19-2082-s001.pdf]

Terpene\_synth (PF01397)

Table of protein sequences for Terpene synthase (PF01397) from various species, including Prunella, Arabidopsis, and other plants. The table shows amino acid alignments across multiple sequences.

Terpene\_synth\_C (PF03016)

Table of protein sequences for the C-terminal domain of Terpene synthase (PF03016) from various species, including Prunella, Arabidopsis, and other plants. The table shows amino acid alignments across multiple sequences.

DDXXD

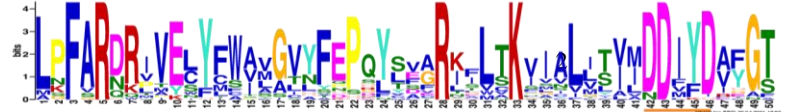



**Figure S1. Alignment of amino acid sequences of 38 PpTPSs.** N-terminal conserved domain (PF01397) and C-terminal conserved domain (PF03936) are marked in red and green boxes, respectively. Three conserved motifs of RRX<sub>8</sub>W, Asp-rich domain DDxxD and NSE/DTE are also labeled.

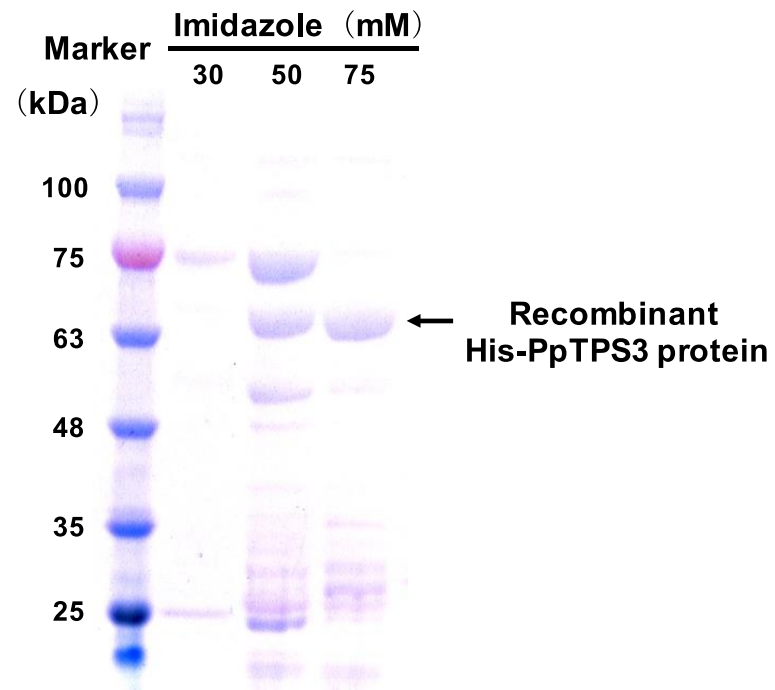

**Figure S2. SDS-PAGE analysis of PpTPS3 protein.**

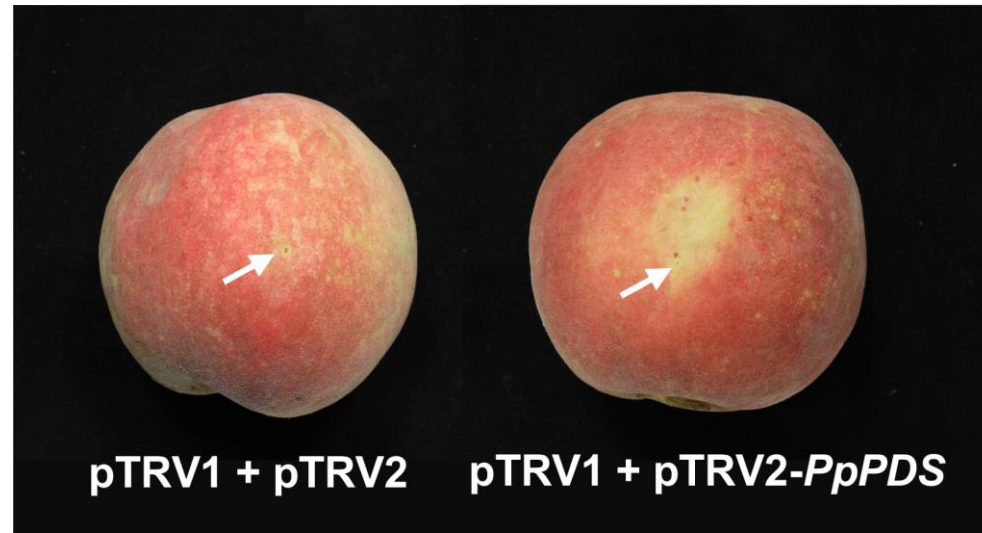

**Figure S3. Silencing of *PpPDS* (Prupe.1G174100) gene in peach fruit.** Empty pTRV1 + pTRV2 vector was used as a control, and phytoene desaturase (*PDS*) was used as a reporter gene for VIGS. The arrow points to the injection hole. The photo was taken two weeks after the infiltration.

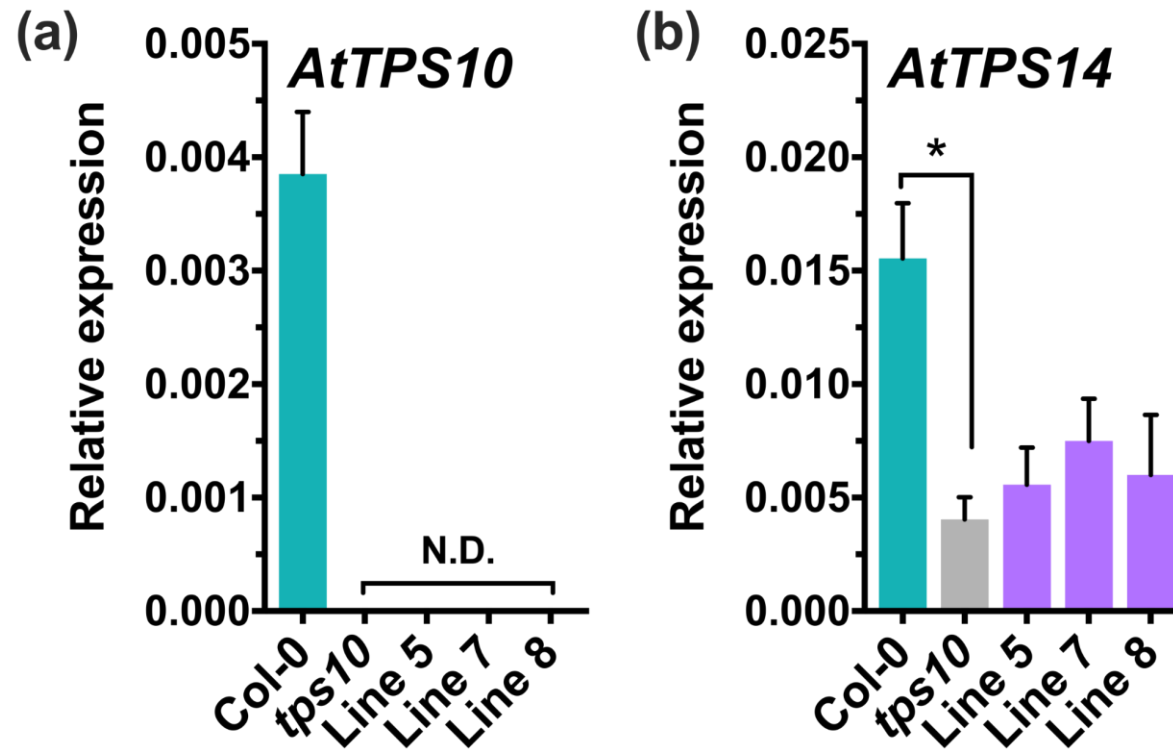

**Figure S4. Expression of *AtTPS10* and *AtTPS14* in *PpTPS3* transgenic Arabidopsis.** Relative expression levels were determined using qRT-PCR. Data are presented as the mean  $\pm$  SE from three independent biological replicates. Significant differences are indicated with asterisks above the bars (\*,  $P < 0.05$ ). N.D., Not Detected.

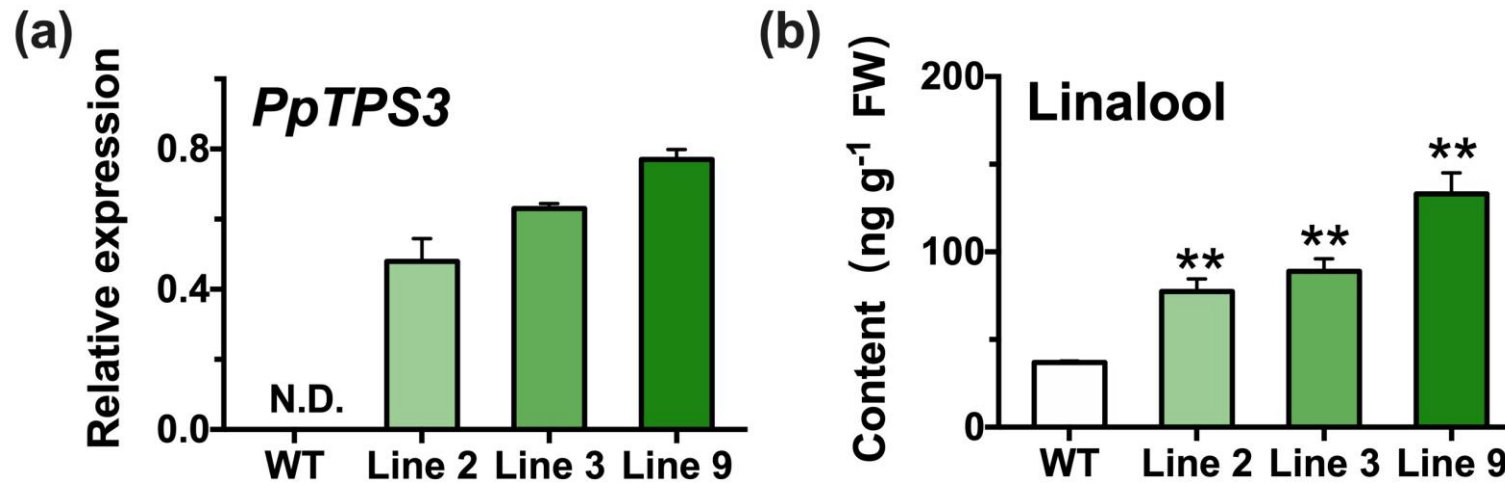

**Figure S5. Changes in content of free linalool in *PpTPS3* transgenic tomato leaves.** (a) Relative expression of *PpTPS3* in wild type and transgenic tomato leaves. (b) The content of linalool in wild type and transgenic tomato leaves. Volatiles were identified using gas chromatography–mass spectrometry (GC–MS). Data are presented as the mean  $\pm$  SE from three independent biological replicates. Wild-type (WT) plant was used as control. Significant differences are compared against controls and indicated with asterisks above the bars (\*\*,  $P < 0.01$ ). N.D., Not Detected.



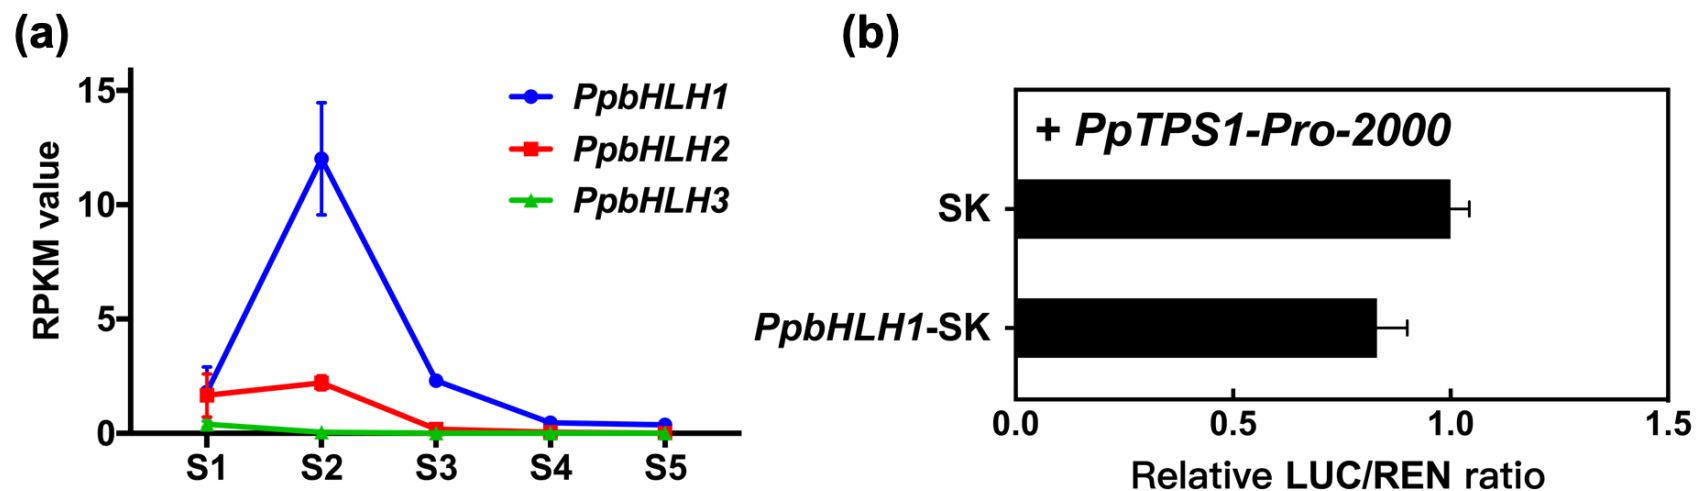

**Figure S6. Expression profiles of three bHLH genes and regulatory effect of PpbHLH1 on the promoter of *PpTPS1*.** (a) Expression profiles of three bHLH genes during peach fruit ripening. The RNA-seq was conducted with three biological replicates. (b) Regulatory effect of PpbHLH1 on the promoter of *PpTPS1*. Relative LUC/REN value of the empty vector on *PpTPS1* promoter was used as the calibrator, set as 1. S.E.s were calculated from at six replicates. Statistical significance was determined by Student's two-tail *t* test.

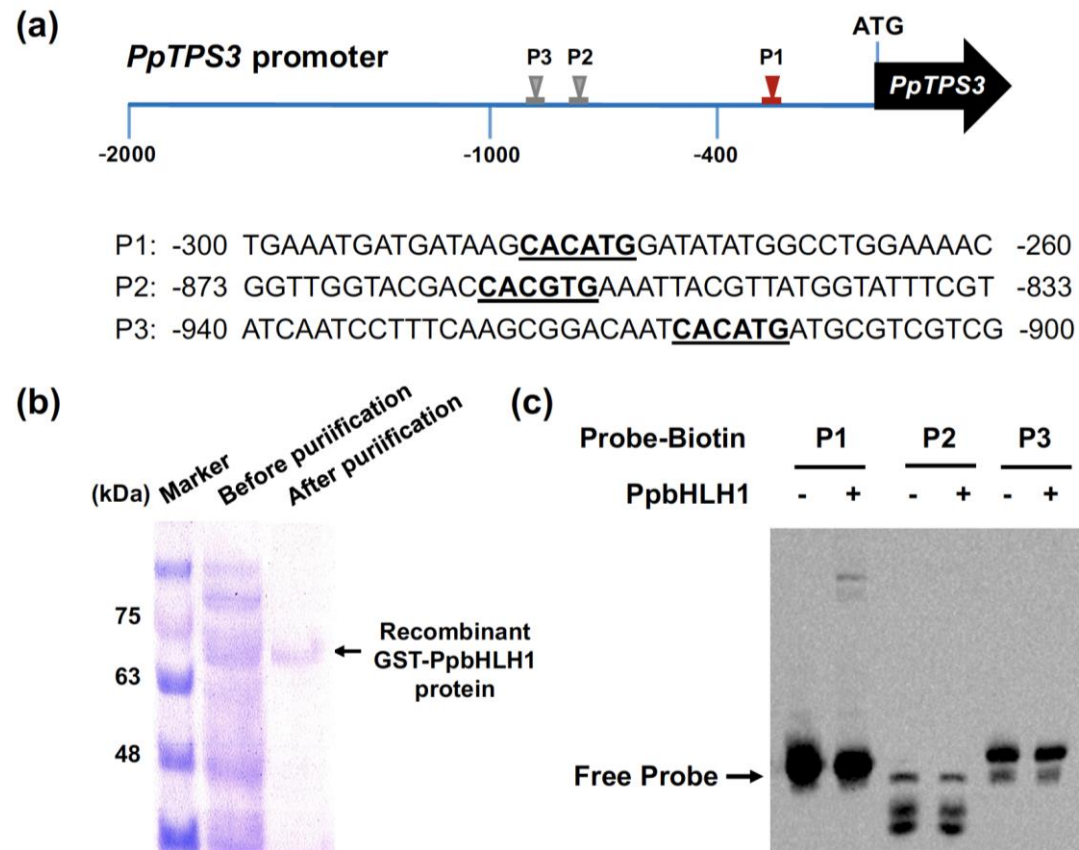

**Figure S7. PpbHLH1 binds to *PpTPS3* promoter.** (a) The three probes sequences used for EMSA. (b) SDS-PAGE analysis of PpbHLH1 protein. (c) EMSA of PpbHLH1 binding to *PpTPS3* promoter. Presence or absence of specific probes is marked by symbol + or -.

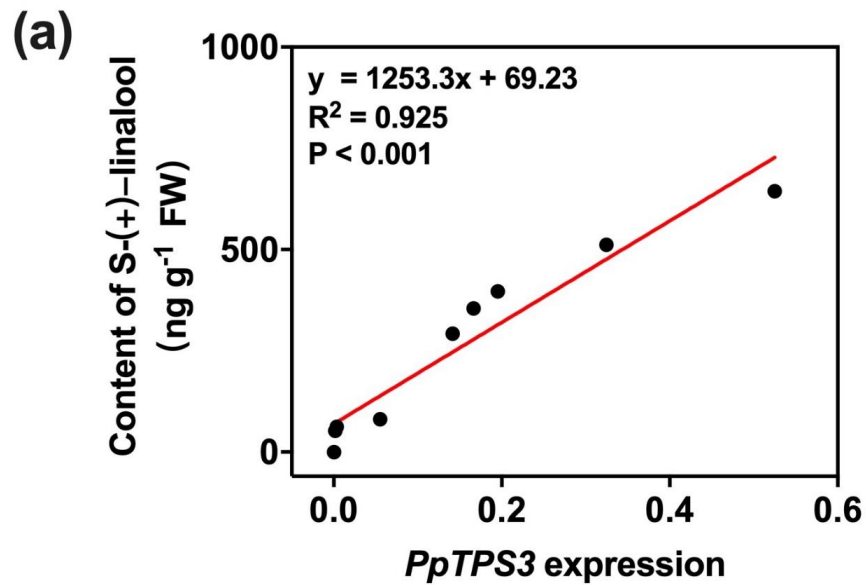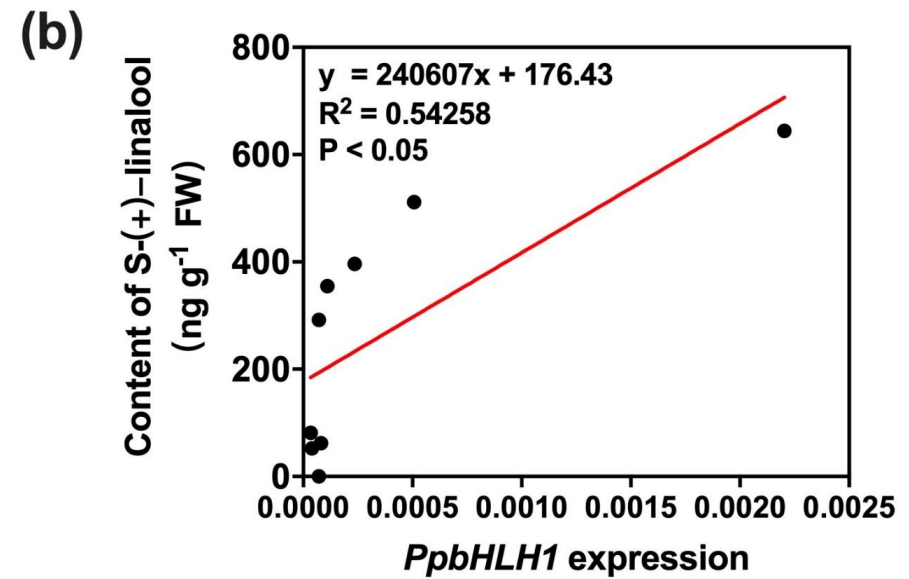

**Figure S8. Correlation between transcript and S-(+)-Linalool content in different peach cultivars. (a)** Correlation between *PpTPS3* expression and S-(+)-Linalool content in peach cultivars. **(b)** Correlation between *PpbHLH1* expression and S-(+)-Linalool content in peach cultivars.



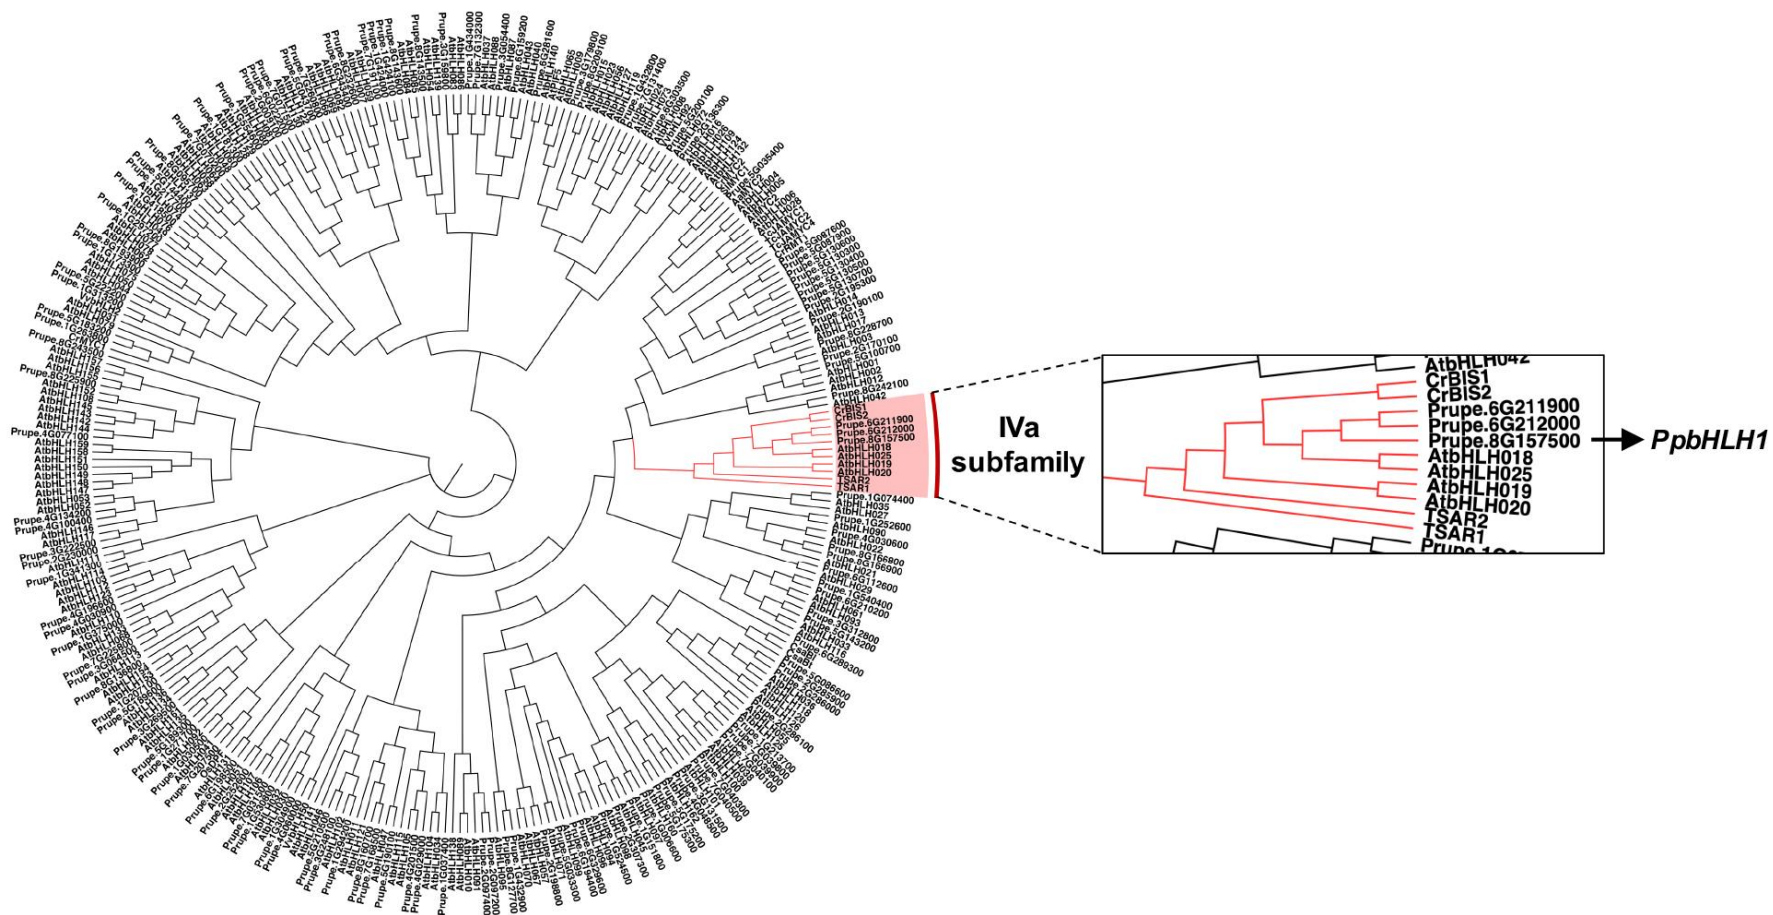

**Figure S10. Phylogenetic tree constructed using the sequences of bHLH proteins from both peach and Arabidopsis with some bHLH proteins which regulate linalool or terpene formation in other species.**

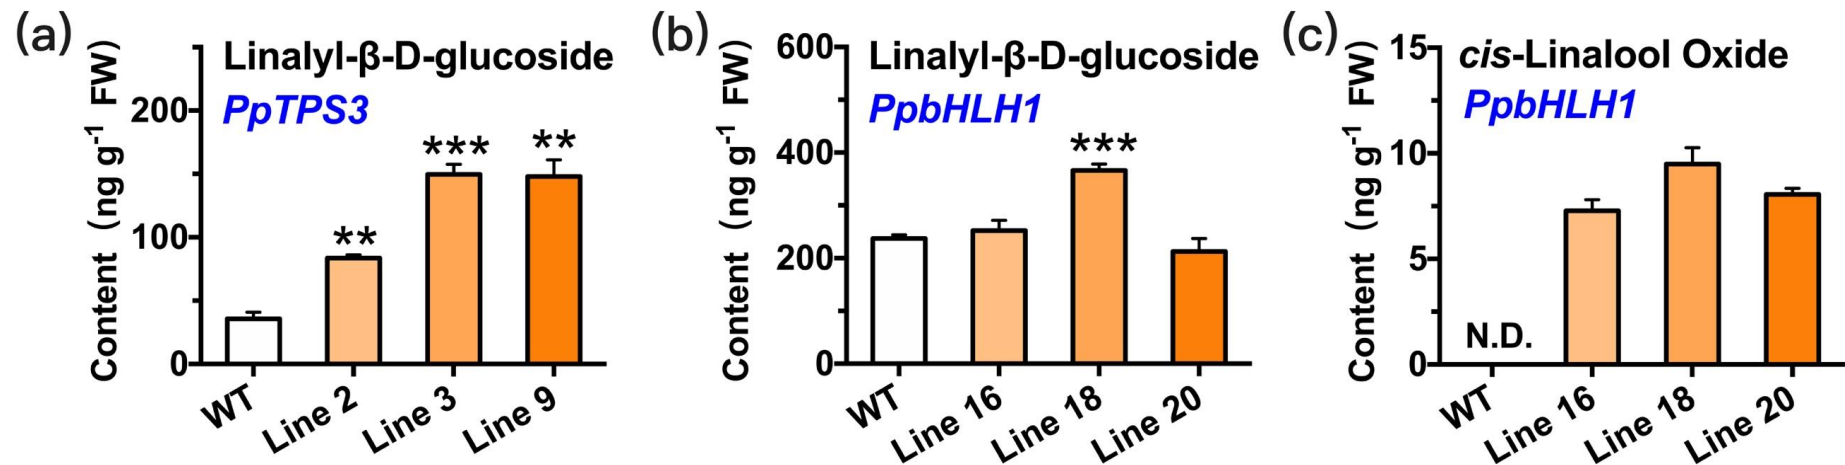

**Figure S11. Changes in content of linalyl-β-d-glucoside and linalool oxide in *PpTPS3* and *PpbHLH1* transgenic tomato fruits.** (a) Content of linalyl-β-d-glucoside in wild type and *PpTPS3* transgenic tomato fruits. (b) Content of linalyl-β-d-glucoside in wild type and *PpbHLH1* transgenic tomato fruits. (c) Content of *cis*-linalool oxide in wild type and *PpbHLH1* transgenic tomato fruits. Data are presented as the mean ± SE from three independent biological replicates. Significant differences are compared against controls and indicated with asterisks above the bars (\*\*,  $P < 0.01$  and \*\*\*,  $P < 0.001$ ).

**Table S1. Content of volatiles in peach fruit during development and ripening.**

| Compound (ng/g FW) | Days after bloom (DAB)   |                   |                                 |                                    |                                    |                                    |
|--------------------|--------------------------|-------------------|---------------------------------|------------------------------------|------------------------------------|------------------------------------|
|                    | 34 (S1)                  | 71 (S2)           | 94 (S3)                         | 108 (S4)                           | 111 (S5)                           |                                    |
| Terpenes           | $\alpha$ -Pinene         | UD                | UD                              | 2.13 $\pm$ 2.13                    | UD                                 | 6.35 $\pm$ 6.35                    |
|                    | $\beta$ -Pinene          | 4.20 $\pm$ 2.69   | 4.76 $\pm$ 2.38                 | 7.07 $\pm$ 5.31                    | 4.73 $\pm$ 2.72                    | 4.89 $\pm$ 2.45                    |
|                    | Myrcene                  | UD                | 3.20 $\pm$ 1.68                 | 8.10 $\pm$ 4.22                    | 5.16 $\pm$ 2.60                    | 9.16 $\pm$ 4.64                    |
|                    | D-Limonene               | 58.51 $\pm$ 17.52 | 73.37 $\pm$ 30.62               | 57.19 $\pm$ 18.96                  | 29.27 $\pm$ 9.51                   | 34.62 $\pm$ 0.73                   |
|                    | $\gamma$ -Terpinene      | UD                | UD                              | 1.13 $\pm$ 1.13                    | 1.35 $\pm$ 1.35                    | UD                                 |
|                    | (Z)-Ocimene              | UD                | UD                              | UD                                 | UD                                 | 14.03 $\pm$ 7.16                   |
|                    | $\alpha$ -terpinene      | 11.98 $\pm$ 10.24 | UD                              | 0.47 $\pm$ 0.47                    | 4.59 $\pm$ 4.59                    | 11.29 $\pm$ 11.29                  |
|                    | 2-Carene                 | UD                | UD                              | UD                                 | 2.20 $\pm$ 2.20                    | UD                                 |
|                    | 2-Camphene               | UD                | UD                              | 7.71 $\pm$ 0.32                    | 3.36 $\pm$ 3.36                    | 5.97 $\pm$ 5.97                    |
|                    | Terpinolene              | UD                | UD                              | 7.69 $\pm$ 3.87                    | 12.80 $\pm$ 6.71                   | 22.7 $\pm$ 11.50                   |
|                    | $\alpha$ -Phellandrene   | UD                | UD                              | 1.03 $\pm$ 1.03                    | UD                                 | UD                                 |
|                    | Caryophyllene            | UD                | 0.77 $\pm$ 0.77                 | UD                                 | UD                                 | UD                                 |
| Terpenoids         | <b>Linalool</b>          | <b>UD</b>         | <b>3.97<math>\pm</math>1.99</b> | <b>140.66<math>\pm</math>12.88</b> | <b>428.24<math>\pm</math>45.96</b> | <b>580.11<math>\pm</math>82.82</b> |
|                    | $\alpha$ -Terpineol      | 0.90 $\pm$ 0.90   | 0.77 $\pm$ 0.77                 | UD                                 | 4.65 $\pm$ 4.65                    | UD                                 |
|                    | Nerolidol                | UD                | UD                              | 2.36 $\pm$ 2.36                    | UD                                 | UD                                 |
|                    | farnesol                 | UD                | UD                              | 3.56 $\pm$ 1.79                    | UD                                 | UD                                 |
|                    | Cedrol                   | 19.56 $\pm$ 14.36 | 6.07 $\pm$ 4.42                 | 2.14 $\pm$ 0.27                    | 2.96 $\pm$ 0.18                    | 7.89 $\pm$ 6.35                    |
| Norisoprenoids     | $\beta$ -Damascenone     | 21.28 $\pm$ 11.21 | 13.3 $\pm$ 0.24                 | 20.92 $\pm$ 1.21                   | 22.76 $\pm$ 4.30                   | 17.12 $\pm$ 4.52                   |
|                    | Dihydro- $\beta$ -Ionone | UD                | UD                              | 36.43 $\pm$ 4.83                   | 35.11 $\pm$ 11.14                  | 45.95 $\pm$ 15.27                  |
|                    | $\beta$ -Ionone          | 70.84 $\pm$ 19.06 | 29.42 $\pm$ 4.90                | 6.37 $\pm$ 3.19                    | 6.88 $\pm$ 6.88                    | 9.97 $\pm$ 9.97                    |

UD, under the limit of detection.

**Table S2. Accession numbers for plant TPSs used for sequence analysis in Figure 2.**

| Abbreviation | GenBank accession |
|--------------|-------------------|--------------|-------------------|--------------|-------------------|--------------|-------------------|
| VvLIS/NES    | ADR74212          | NaLIS        | NIATv7_g00838     | LoTPS1       | AHD24667          | PfLIS        | AAL38029          |
| VvCSLinNer   | HM807393          | OfTPS2       | AMB57286          | MaLIS        | AAP40638          | PfGES/LIS    | ACN42011          |
| VvRiLinNer   | JQ062931          | LiS-LINS     | MG870571          | MdOCS        | JX848733          | PcLIS        | AAX16075          |
| VvPNLinNer1  | ADR74210          | AmNES/LIS-1  | ABR24417          | BcLS         | BAG82825          | MdCAR        | JX848729          |
| VvPNLNG11    | ADR74213          | AmNES/LIS-2  | ABR24418          | AaLIS        | Q9SPN1            | MdGDS        | JX848730          |
| CsLIS/NES    | AGX26045          | AmMS         | AAO41727          | AaQH1        | AF154125          | MdPIN/CAM    | JX848732          |
| AaLS1        | ADD81294          | AmOS         | Q84NC8.1          | AaQH5        | AAF13356          | Pt5          | AAO61226          |
| ApLS1        | GQ338154          | CoLIS        | AFQ20812          | GhLin2       | AJT59543          | PaLIS        | AAS47693          |
| CuLIS        | BAP75559          | OsLIS        | ACF05530          | CaTPS2       | CCM43928          | PcTPS-Lin-1  | ADZ45501          |
| MdLIS        | AGB14629          | LoTPS3       | ---               | PtTPS1       | AII32476          | PcTPS-Lin-2  | ADZ45502          |
| RcLIN-NERS2  | MG673511          | PITPS3       | ARG42161          | SITPS5       | AAX69063          | CbLIS        | AAC49395          |
| FaNES1       | P0CV94            | ObLIS        | AY693647          | CsLINS       | AHC54051          | CbLIS2       | AAD19840          |
| PtTPS3       | AEI52903          | ObGES        | Q6USK1            | HcTPS8       | AGY49283          | ZmTPS1       | AAO18435          |
| GhTPS12      | AJT59541          | CrGES        | AFD64744          | AtTPS10      | At2g24210         | AtCPS1       | NP_192187         |
| RcLIN-NERS1  | MG673510          | OfTPS1       | AMB57285          | PdLIS        | ATY48639          | CmCPS        | AAD04292          |
| MtTPS3       | AAV36466          | OeGES1       | AFI47926          | MsLS         | AAC37366          | SITPS40      | JN412074          |
| PITPS4       | ARG42162          | RcLINS       | MG673509          | LaRLin       | ABD77417          | SrCPS        | AAB87091          |
| AtTPS14      | At1g61680         | VvPNRLin     | ADR74209          | LaLINS       | ABB73045          |              |                   |
| SITPS37      | AEP82769          | PtTPS4       | AEI52904          | McLIS        | AY083653          |              |                   |
| SITPS39      | AEP82767          | McTPS1       | ART66980          | MaLin        | AAL99381          |              |                   |



**Table S3. Peach homologues of transcription factors that regulate terpenoid formation.**

| TF families                | Species                      | Description      | Gene ID                   | Peach ID              | Name                            | References                                                  |
|----------------------------|------------------------------|------------------|---------------------------|-----------------------|---------------------------------|-------------------------------------------------------------|
| NAC                        | <i>Actinidia arguta</i>      | AaNAC1           | KF319046                  | Prupe.4G187100        | PpNAC1                          | Nieuwenhuizen <i>et al.</i> , 2015                          |
|                            |                              | AaNAC2           | KF319047                  | Prupe.4G040900        | PpNAC2                          |                                                             |
|                            |                              | AaNAC3           | KF319048                  | Prupe.4G040900        | PpNAC2                          |                                                             |
|                            |                              | AaNAC4           | KF319049                  | Prupe.1G220400        | PpNAC4                          |                                                             |
|                            | <i>Actinidia deliciosa</i>   | AdNAC6/7         | Achn208181/Achn077531     | Prupe.5G196000        | PpNAC6                          | Wang <i>et al.</i> , 2019                                   |
|                            | <i>Artemisia annua</i>       | AaNAC1           | KX082975                  | Prupe.1G493100        | PpNAC8                          | Lv <i>et al.</i> , 2016                                     |
| MYB                        | <i>Freesia hybrida</i>       | <b>FhMYB21L1</b> | <b>QNC43969</b>           | <b>Prupe.5G222400</b> | <b>PpMYB1</b>                   | Yang <i>et al.</i> , 2020                                   |
|                            |                              | <b>FhMYB21L2</b> | <b>QNC43970</b>           | <b>Prupe.5G031700</b> | Not expressed in peach          |                                                             |
|                            | <i>Mentha spicata</i>        | MsMYB            | KY081780                  | Prupe.8G164300        | PpMYB2                          | Reddy <i>et al.</i> , 2017                                  |
|                            | <i>Catharanthus roseus</i>   | CrBPF1           | AJ251686                  | Prupe.2G237100        | PpMYB3                          | Li <i>et al.</i> , 2015                                     |
| WRKY                       | <i>Artemisia annua</i>       | AaWRKY1          | FJ390842                  | Prupe.5G117000        | PpWRKY1                         | Ma <i>et al.</i> , 2009                                     |
|                            | <i>Gossypium arboreum</i>    | GaWRKY1          | AY507929                  | Prupe.1G393000        | PpWRKY2                         | Xu <i>et al.</i> , 2004                                     |
|                            | <i>Solanum lycopersicum</i>  | <b>SIWRKY73</b>  | <b>Solyc03g113120.2.1</b> | <b>Prupe.5G187800</b> | <b>PpWRKY73</b>                 | Spyropoulou <i>et al.</i> , 2014                            |
|                            |                              | WRKY45           | AK066255                  | Prupe.6G295100        | PpWRKY45                        | Akagi <i>et al.</i> , 2014;<br>Shimono <i>et al.</i> , 2007 |
|                            | <i>Oryza sativa</i>          | WRKY53           | AB190436                  | Prupe.6G286000        | PpWRKY53                        | Schlutenhofer and Yuan, 2015                                |
|                            |                              | WRKY76           | AK068337                  | Prupe.6G230600        | PpWRKY76                        |                                                             |
|                            | <i>Nicotiana benthamiana</i> | WRKY8            | AB445392                  | Prupe.6G046900        | PpWRKY8                         |                                                             |
|                            | <i>Panax quinquefolius</i>   | PqWRKY1          | JF508376                  | Prupe.1G431100        | PpWRKY3                         |                                                             |
| <i>Catharanthus roseus</i> | CrWRKY1                      | HQ646368         | Prupe.6G295100            | PpWRKY4               | Suttipanta <i>et al.</i> , 2011 |                                                             |
| bHLH                       | <i>Arabidopsis thaliana</i>  | AtMYC2           | At1g32640                 | Prupe.5G035400        | PpMYC2                          | Hong <i>et al.</i> , 2012                                   |
|                            | <i>Artemisia annua</i>       | AabHLH1          | AGH25053                  | Prupe.5G035400        | PpMYC2                          | Ji <i>et al.</i> , 2014                                     |
|                            | <i>Catharanthus roseus</i>   | CrMYC1           | AF283506                  | Prupe.8G095700        | PpMYC1                          | Chatel <i>et al.</i> , 2003                                 |
|                            |                              | CrMYC2           | AF283507                  | Prupe.5G035400        | PpMYC2                          | Zhang <i>et al.</i> , 2011                                  |

|     |                               |                         |                                |                       |                           |                                                              |
|-----|-------------------------------|-------------------------|--------------------------------|-----------------------|---------------------------|--------------------------------------------------------------|
|     |                               | <b>CrBIS1</b>           | <b>KM409646</b>                | <b>Prupe.8G157500</b> | <b>PpbHLH1</b>            | van Moerkercke <i>et al.</i> , 2015                          |
|     |                               | CrBIS2                  | KM409645                       | Prupe.6G211900        | PpbHLH2                   | van Moerkercke <i>et al.</i> , 2016                          |
|     | <i>Oryza sativa</i>           | OsbHLH025 (DPF)         | Os01g0196300                   | Prupe.7G207500        | PpbHLH25                  | Yamamura <i>et al.</i> , 2015                                |
|     | <i>Medicago truncatula</i>    | TSAR1-2                 | Medtr7g080780<br>Medtr4g066460 | Prupe.6G212000        | PpbHLH3                   | Mertens <i>et al.</i> , 2016                                 |
|     | <i>Phalaenopsis bellina</i>   | PbbHLH4                 | KY979199                       | Prupe.5G143200        | PpbHLH4                   | Chuang <i>et al.</i> , 2018                                  |
|     | <i>Taxus cuspidata</i>        | TcMYC1,<br>TcJAMYC1/2/4 | FJ608574/JX519289<br>/JX519290 | Prupe.5G035400        | PpMYC2                    | Lenka <i>et al.</i> , 2015                                   |
|     | <i>Cucumis sativus</i>        | Bl, Bt                  | Csa5G156220                    | Prupe.2G286100        | Not expressed<br>in peach | Shang <i>et al.</i> , 2014                                   |
|     |                               |                         | Csa5G157230                    | Prupe.2G286000        | Not expressed<br>in peach |                                                              |
|     | <i>Freesia hybrida</i>        | FhMYC2                  | QNC43971                       | Prupe.5G035400        | PpMYC2                    | Yang <i>et al.</i> , 2020                                    |
|     | <i>Solanum lycopersicum</i>   | <b>SIMYC1</b>           | <b>KF430611</b>                | <b>Prupe.5G035400</b> | <b>PpMYC2</b>             | Spyropoulou <i>et al.</i> , 2014;<br>Xu <i>et al.</i> , 2019 |
|     | <i>Malus domestica</i>        | MdMYC2                  | MDP0000029168                  | Prupe.5G035400        | PpMYC2                    | Wang <i>et al.</i> , 2020                                    |
|     |                               | AaERF1                  | JN162091                       | Prupe.5G061800        | PpERF1                    |                                                              |
|     | <i>Artemisia annua</i>        | AaERF2                  | JN162092                       | Prupe.2G272400        | PpERF2                    | Yu <i>et al.</i> , 2012                                      |
|     |                               | AaORA                   | JQ797708                       | Prupe.2G129400        | PpERF3                    | Lu <i>et al.</i> , 2013                                      |
|     | <i>Catharanthus roseus</i>    | CrORCA3                 | CAB96899                       | Prupe.2G129300        | Not expressed<br>in peach | van der Fits and<br>Memelink, 2000                           |
| ERF |                               | CrORCA4/CrORCA5         | KR703577/KR703578              | Prupe.2G129300        | Not expressed<br>in peach | Paul <i>et al.</i> , 2017                                    |
|     | <i>Zea mays</i>               | ZmEREB58                | NP_001170395.1                 | Prupe.1G037900        | PpEREB58                  | Li <i>et al.</i> , 2015                                      |
|     |                               | CitAP2.10               | orange1.1t02867.1              | Prupe.3G104100        | PpAP2                     | Shen <i>et al.</i> , 2016                                    |
|     | <i>Citrus sinensis Osbeck</i> | CitERF71                | orange1.1g047100m              | Prupe.2G129300        | Not expressed<br>in peach | Li <i>et al.</i> , 2017                                      |
|     | <i>Malus domestica</i>        | MdERF3                  | MDP0000787281                  | Prupe.5G061800        | PpERF1                    | Wang <i>et al.</i> , 2020                                    |
| EIL | <i>Actinidia chinensis</i>    | AcEIL1                  | KF319041                       | Prupe.2G058400        |                           | Nieuwenhuizen <i>et al.</i> , 2015                           |
|     |                               | AcEIL2                  | KF319042                       | Prupe.2G058400        | PpEIL1                    |                                                              |

|       |                             |               |                   |                       |               |                                  |
|-------|-----------------------------|---------------|-------------------|-----------------------|---------------|----------------------------------|
|       |                             | AcEIL3        | KF319043          | Prupe.6G018200        |               |                                  |
|       |                             | AcEIL4        | KF319044          | Prupe.6G018200        | PpEIL3        |                                  |
|       | <i>Actinidia arguta</i>     | AaEIL4        | KF319045          | Prupe.6G018200        |               |                                  |
| bZIP  | <i>Artemisia annua</i>      | AabZIP1       | contig131774      | Prupe.1G434500        | PpbZIP1       | Zhang <i>et al.</i> , 2015       |
|       | <i>Oryza sativa</i>         | OsTGAP1       | AK073715          | Prupe.1G307300        | PpbZIP2       | Okada <i>et al.</i> , 2009       |
|       |                             | OsZIP79       | Os11g0152700      | Prupe.6G129100        | PpbZIP79      | Miyamoto <i>et al.</i> , 2015    |
| EOT   | <i>Solanum lycopersicum</i> | <b>SIEOT1</b> | <b>AGW27396.1</b> | <b>Prupe.1G371500</b> | <b>PpEOT1</b> | Spyropoulou <i>et al.</i> , 2014 |
| YABBY | <i>Mentha spicata</i>       | MsYABBY5      | AMA07776          | Prupe.7G245200        | PpYABBY5      | Wang <i>et al.</i> , 2016        |
|       | <i>Artemisia annua</i>      | AaYABBY5      | MK675289          | Prupe.7G245200        |               | Kayani <i>et al.</i> , 2019      |

**Bold** indicates transcription factors associated with linalool synthesis.

#### References:

- Akagi, A., Fukushima, S., Okada, K., Jiang, C.J., Yoshida, R., Nakayama, A., Shimono, M. *et al.* (2014) WRKY45-dependent priming of diterpenoid phytoalexin biosynthesis in rice and the role of cytokinin in triggering the reaction. *Plant Mol.Biol.* **86**, 171–183.
- Chatel, G., Montiel, G., Pr e M., Memelink, J., Thiersault, M., Saint-Pierre, B., Doireau, P. *et al.* (2003) *CrMYC1*, a *Catharanthus roseus* elicitor- and jasmonate-responsive bHLH transcription factor that binds the G-box element of the strictosidine synthase gene promoter. *J. Exp. Bot.* **54**, 2587–2588.
- Hong, G.J., Xue, X.Y., Mao, Y.B., Wang, L.J. and Chen, X.Y. (2012) Arabidopsis MYC2 interacts with DELLA proteins in regulating sesquiterpene synthase gene expression. *Plant Cell*, **24**, 2635–2648.
- Ji, Y.P., Xiao, J.W., Shen, Y.L., Ma, D.M., Li, Z.Q., Pu, G.B., Li, X. *et al.* (2014) Cloning and characterization of AabHLH1, a bHLH transcription factor that positively regulates artemisinin biosynthesis in *Artemisia annua*. *Plant Cell Physiol.* **55**, 1592-1604.
- Kayani, S.-I., Shen, Q., Ma, Y.N., Fu, X.Q., Xie, L.H., Zhong, Y.J., Tiantian, C. *et al.* (2019). The YABBY family transcription factor AaYABBY5 directly targets Cytochrome P450 Monooxygenase (CYP71AV1) and Double-Bond Reductase 2 (DBR2) involved in artemisinin biosynthesis in *Artemisia Annua*. *Front. Plant Sci.* **10**, 1084.
- Lenka, S.K., Nims, N.E., Vongpaseuth, K., Boshar, R.A., Roberts, S.C. and Walker, E.I. (2015) Jasmonate-responsive expression of paclitaxel biosynthesis genes in *Taxus cuspidata* cultured cells is negatively regulated by the bHLH transcription factors TcJAMYC1, TcJAMYC2, and TcJAMYC4. *Front. Plant Sci.* **6**, 115.
- Li, C.Y., Leopold, A.L., Sander, G.W., Shanks, J.V., Zhao, L. and Gibson, S.I. (2015) CrBPF1 overexpression alters transcript levels of terpenoid indole alkaloid biosynthetic and regulatory genes. *Front. Plant Sci.* **6**, 818.

- Li, S.Y., Wang, H., Li, F.Q., Chen, Z.L., Li, X.Y., Zhu, L., Wang, G.R. *et al.* (2015) The maize transcription factor EREB58 mediates the jasmonate-induced production of sesquiterpene volatiles. *Plant J.* **84**, 296–308.
- Li, X., Xu, Y.Y., Shen, S.L., Yin, X.R., Klee, H., Zhang, B. and Chen, K.S. (2017). Transcription factor CitERF71 activates the terpene synthase gene CitTPS16 involved in the synthesis of E-geraniol in sweet orange fruit. *J. Exp. Bot.* **68**, 4929–4938.
- Lu, X., Zhang, L., Zhang, F.Y., Jiang, W.M., Shen, Q., Zhang, L.D., Lv, Z.Y. *et al.* (2013) AaORA, a trichome-specific AP2/ERF transcription factor of *Artemisia annua*, is a positive regulator in the artemisinin biosynthetic pathway and in disease resistance to *Botrytis cinerea*. *New Phytol.* **198**, 1191–1202.
- Lv, Z.Y., Wang, S., Zhang, F.Y., Chen, L.X., Hao, X.L., Pan, Q.F., Fu, X.Q. *et al.* (2016) Overexpression of a novel NAC domain-containing transcription factor gene (*AaNAC1*) enhances the content of artemisinin and increases tolerance to drought and *Botrytis cinerea* in *Artemisia annua*. *Plant Cell Physiol.* **57**, 1961–1971.
- Ma, D.M., Pu, G.B., Lei, C.Y., Ma, L.Q., Wang, H.H., Guo, Y.W., Chen, J.L. *et al.* (2009) Isolation and characterization of *AaWRKY1*, an *Artemisia annua* transcription factor that regulates the amorpha-4,11-diene synthase gene, a key gene of artemisinin biosynthesis. *Plant Cell Physiol.* **50**, 2146–2161.
- Mertens, J., Pollier, J., Vanden Bossche, R., Lopez-Vidriero, I., Franco-Zorrilla, J.M. and Goossens, A. (2016) The bHLH transcription factors TSAR1 and TSAR2 regulate triterpene saponin biosynthesis in *Medicago truncatula*. *Plant Physiol.* **170**, 194–210.
- Miyamoto, K., Nishizawa, Y., Minami, E., Nojiri, H., Yamane, H. and Okada, K. (2015). Overexpression of the bZIP transcription factor OsbZIP79 suppresses the production of diterpenoid phytoalexin in rice cells. *J. Plant Physiol.* **173**, 19–27.
- Okada, A., Okada, K., Miyamoto, K., Koga, J., Shibuya, N., Nojiri, H. and Yamane, H. (2009) OsTGAP1, a bZIP transcription factor, coordinately regulates the inductive production of diterpenoid phytoalexins in Rice. *J. Biol. Chem.* **284**, 26510–26518.
- Paul, P., Singh, S.K., Patra, B., Sui, X., Pattanaik, S. and Yuan, L. (2017) A differentially regulated AP2/ERF transcription factor gene cluster acts downstream of a MAP kinase cascade to modulate terpenoid indole alkaloid biosynthesis in *Catharanthus roseus*. *New Phytol.* **213**, 1107–1123.
- Reddy, V.A., Wang, Q., Dhar, N., Kumar, N., Venkatesh, P.N., Rajan, C. and Panicker, D. *et al.* (2017) Spearmint R2R3-MYB transcription factor MsMYB negatively regulates monoterpene production and suppresses the expression of geranyl diphosphate synthase large subunit (*MsGPPS. LSU*). *Plant Biotechnol. J.* **5**, 1105–1119.
- Schluttenhofer, C. and Yuan, L. (2015) Regulation of specialized metabolism by WRKY transcription factors. *Plant Physiol.* **167**, 295–306.
- Shang, Y., Ma, Y.S., Zhou, Y., Zhang, H.M., Duan, L.X., Chen, H.M., Zeng, J.G. *et al.* (2014) Biosynthesis, regulation, and domestication of bitterness in cucumber. *Science*, **346**, 1084–1088.
- Shen, S.L., Yin, X.R., Zhang, B., Xie, X.L., Jiang, Q., Grierson, D. and Chen, K.S. (2016) CitAP2.10 activation of the terpene synthase CsTPS1 is associated with the synthesis of (+)-valencene in ‘Newhall’ orange. *J. Exp. Bot.* **67**, 4105–4115.

- Shimono, M., Sugano, S., Nakayama, A., Jiang, C.J., Ono, K., Toki, S. and Takatsuji, H. (2007) Rice WRKY45 plays a crucial role in benzothiadiazole-inducible blast resistance. *Plant Cell*, **19**, 2064–2076.
- Suttipanta, N., Pattanaik, S., Kulshrestha, M., Patra, B., Singh, S.K. and Yuan, L. (2011) The transcription factor CrWRKY1 positively regulates the terpenoid indole alkaloid biosynthesis in *Catharanthus roseus*. *Plant Physiol.* **157**, 2081–2093.
- van der Fits, L. and Memelink, J. (2000) ORCA3, a jasmonate-responsive transcriptional regulator of plant primary and secondary metabolism. *Science*, **289**, 295–297.
- Van Moerkercke, A., Steensma, P., Gariboldi, I., Espoz, J., Purnama, P.C., Schweizer, F., Miettinen, K. *et al.* (2016) The basic helix-loop-helix transcription factor BIS2 is essential for monoterpenoid indole alkaloid production in the medicinal plant *Catharanthus roseus*. *Plant J.* **88**, 3–12.
- Van Moerkercke, A., Steensma, P., Schweizer, F., Pollier, J., Gariboldi, I., Payne, R., Vanden Bossche, R. *et al.* (2015) The bHLH transcription factor BIS1 controls the iridoid branch of the monoterpenoid indole alkaloid pathway in *Catharanthus roseus*. *Proc. Natl. Acad. Sci. USA*, **112**, 8130–8135.
- Wang, Q., Liu, H., Zhang, M., Liu, S.H., Hao, Y.J. and Zhang, Y.H. (2020) MdMYC2 and MdERF3 positively co-regulate  $\alpha$ -Farnesene biosynthesis in apple. *Front. Plant Sci.* **11**, 512844.
- Wang, Q., Reddy, V.A., Panicker, D., Mao, H.Z., Kumar, N., Rajan, C., Venkatesh, P.N. *et al.* (2016). Metabolic engineering of terpene biosynthesis in plants using a trichome-specific transcription factor *MsYABBY5* from spearmint (*Mentha spicata*). *Plant Biotechnol. J.* **14**, 1619–1632.
- Wang, W.Q., Wang, J., Wu, Y.Y., Li, D.W., Allan, A.C. and Yin, X.R. (2019) Genome-wide analysis of coding and non-coding RNA reveals a conserved miR164-NAC regulatory pathway for fruit ripening. *New Phytol.* **225**, 1618–1634.
- Xu, Y.H., Wang, J.W., Wang, S., Wang, J.Y. and Chen, X.Y. (2004) Characterization of GaWRKY1, a cotton transcription factor that regulates the sesquiterpene synthase gene (+)- $\delta$ -cadinene synthase-A. *Plant Physiol.* **135**, 507–515.
- Yamamura, C., Mizutani, E., Okada, K., Nakagawa, H., Fukushima, S., Tanaka, A., Maeda, S. *et al.* (2015) Diterpenoid phytoalexin factor, a bHLH transcription factor, plays a central role in the biosynthesis of diterpenoid phytoalexins in rice. *Plant J.* **84**, 1100–1113.
- Yu, Z.X., Li, J.X., Yang, C.Q., Hu, W.L., Wang, L.J. and Chen, X.Y. (2012) The jasmonate-responsive AP2/ERF transcription factors AaERF1 and AaERF2 positively regulate artemisinin biosynthesis in *Artemisia annua* L. *Mol. Plant.* **5**, 353–365.
- Zhang, F.Y., Fu, X.Q., Lv, Z.Y., Lu, X., Shen, Q., Zhang, L., Zhu, M.M. *et al.* (2015). A basic Leucine Zipper transcription factor, AabZIP1, connects abscisic acid signaling with artemisinin biosynthesis in *Artemisia annua*. *Mol. Plant.* **8**, 163–175.
- Zhang, H., Hedhili, S., Montiel, G., Zhang, Y.X., Chatel, G., Pr é M., Gantet, P. *et al.* (2011) The basic helix-loop-helix transcription factor CrMYC2 controls the jasmonate-responsive expression of the ORCA genes that regulate alkaloid biosynthesis in *Catharanthus roseus*. *Plant J.* **67**, 61–71.

**Table S4. Primers of TFs which have expression correlation with *PpTPS3* during peach fruit ripening.**

| Family | Peach ID       | Correlation with <i>PpTPS3</i> | Name    | Primer-SK (5')                      | Primer-SK (3')                       |
|--------|----------------|--------------------------------|---------|-------------------------------------|--------------------------------------|
| bHLH   | Prupe.4G077100 | 0.85456                        | PpbHLH5 | agaactagtggatccATGCAGAGGGACCAACAGTT | cccctcgaggtcgacTTAGTCATTCAAATTCTCAA  |
|        | Prupe.1G173300 | 0.80985                        | PpbHLH6 | agaactagtggatccATGGGAAAAGACAGAACAGC | cccctcgaggtcgacTTATAGCTCAACTTTCATCT  |
|        | Prupe.6G343400 | 0.70216                        | PpbHLH7 | agaactagtggatccATGGCGGGAAATCCGCCTGA | cccctcgaggtcgacCTATGAAGAGGAGTTTGATT  |
|        | Prupe.1G207100 | 0.66293                        | PpbHLH8 | agaactagtggatccATGATTGTTAGCTCTCTCTG | cccctcgaggtcgacTCAATGGAATTGTGAGATGG  |
| bZIP   | Prupe.1G369300 | 0.82833                        | PpbZIP3 | agaactagtggatccATGGAGGGCAGTGATGAAAC | cccctcgaggtcgacCTATTCGCTTGACTCGTGCT  |
|        | Prupe.8G091600 | 0.79739                        | PpbZIP4 | agaactagtggatccATGGCTTCTTCTAGTGGGAC | cccctcgaggtcgacTCAGTAATGAAACATCTCTG  |
|        | Prupe.2G263700 | 0.77684                        | PpbZIP5 | agaactagtggatccATGCAAGATCCGGCGAACCC | cccctcgaggtcgacTCAAAATCTCCTGTTGCTTT  |
|        | Prupe.8G267100 | 0.77304                        | PpbZIP6 | agaactagtggatccATGTCTTCAGTTCAGCAGCA | cccctcgaggtcgacTCAGCCGAGAAACATGTCCG  |
|        | Prupe.1G374400 | 0.76511                        | PpbZIP7 | agaactagtggatccATGGCTTCTTCTAGTGGGAA | cccctcgaggtcgacTTAGTATTGATGGAGCATGT  |
|        | Prupe.5G211200 | 0.58722                        | PpbZIP8 | agaactagtggatccATGGAGCCAAATGAATCAAA | cccctcgaggtcgacTCATGGGGTACTGGAATCTT  |
|        | Prupe.1G478400 | 0.58511                        | PpbZIP9 | agaactagtggatccATGCAAGAGCAAGCGACGAG | cccctcgaggtcgacCTATAAGGATCCTTCTGCAT  |
| ERF    | Prupe.3G032300 | 0.83867                        | PpERF4  | agaactagtggatccATGTGTGGAGGTGCTATAAT | cccctcgaggtcgacTCAGAAACCTCCCCAATCA   |
|        | Prupe.4G051200 | 0.79244                        | PpERF5  | agaactagtggatccATGGCGACTGCTTCTTCATC | cccctcgaggtcgacTCACAGCCACAAGGGTGGGG  |
|        | Prupe.8G264900 | 0.60191                        | PpERF6  | agaactagtggatccATGTGTGGCGGTGCTATTCT | cccctcgaggtcgacTTACGGAGCAGAAACGCGGT  |
|        | Prupe.5G090000 | 0.5465                         | PpERF7  | agaactagtggatccATGGACATGTTCTCCGCTCA | cccctcgaggtcgacTCAGATAGAGAACTCCATA   |
|        | Prupe.5G117800 | 0.51657                        | PpERF61 | agaactagtggatccATGGACACAATGCAAGACAG | cccctcgaggtcgacCTAATTAGCAAGAACTCCC   |
| MADS   | Prupe.1G531700 | 0.74244                        | PpMADS1 | agaactagtggatccATGATGAGGGAGAAGATCAA | cccctcgaggtcgacCTAGGGAAGCCCCAGTTTGA  |
|        | Prupe.1G531600 | 0.70606                        | PpMADS2 | agaactagtggatccATGATGAGGAATAAGATCAA | cccctcgaggtcgacTCACCCAGTTTGTGAGAGACA |

|      |                |         |          |                                     |                                      |
|------|----------------|---------|----------|-------------------------------------|--------------------------------------|
| MYB  | Prupe.3G045300 | 0.79317 | PpMYB4   | agaactagtggatccATGGGAAACCAAAAGCAAAA | cccctcgaggtcgacCTACGCCAAGGCGACAACCTT |
|      | Prupe.6G255800 | 0.60963 | PpMYB5   | agaactagtggatccATGGAAATGAAGGAGAGACA | cccctcgaggtcgacTCACCGGCCATTAGGCTCAG  |
| NAC  | Prupe.4G053300 | 0.81331 | PpNAC9   | agaactagtggatccATGACATGGTGCAATGACTC | cccctcgaggtcgacCTATTTTCTCTCAAGCTTTC  |
|      | Prupe.4G187100 | 0.7711  | PpNAC1   | agaactagtggatccATGGAGAGCACCGACTCCTC | cccctcgaggtcgacCTATCCCAAATTGGACTCAG  |
|      | Prupe.7G001400 | 0.71459 | PpNAC10  | agaactagtggatccATGGAACAAAACATGGTGGT | cccctcgaggtcgacTCAGAAGTCCCACAAGCCTT  |
| WRKY | Prupe.6G230600 | 0.8711  | PpWRKY76 | agaactagtggatccATGGCTGTAGATTTTATGGG | cccctcgaggtcgacCTAAGACGATTCTAGAATGA  |
|      | Prupe.1G431100 | 0.73225 | PpWRKY3  | agaactagtggatccATGGCTGTGGAGCTCATGAT | cccctcgaggtcgacTTAAGATGATTCGAGGACGA  |
|      | Prupe.5G117000 | 0.70191 | PpWRKY1  | agaactagtggatccATGGATTCTAGTAAGAGCTG | cccctcgaggtcgacTTATGAGAAAATTCCTGTGG  |
|      | Prupe.6G286000 | 0.56201 | PpWRKY53 | agaactagtggatccATGACTTCCTCTTTCCTCA  | cccctcgaggtcgacTTAGAACTCTGGAAATCCAT  |

Lowercase letters indicate sequences on the vector.

**Table S5. The light response-related *cis*-acting elements of *PpbHLH1* promoter.**

| Motif              | Motif sequence | Position | Number | Organism                         | Short function                                                         |
|--------------------|----------------|----------|--------|----------------------------------|------------------------------------------------------------------------|
| ACE                | GACACGTATG     | 1472     | + 9    | <i>Petroselinum crispum</i>      | <i>cis</i> -acting element involved in light responsiveness            |
| 3-AF1 binding site | TAAGAGAGGAA    | 313      | + 10   | <i>Solanum tuberosum</i>         | light responsive element                                               |
| Box 4              | ATTAAT         | 120      | + 6    | <i>Petroselinum crispum</i>      | part of a conserved DNA module involved in light responsiveness        |
|                    | ATTAAT         | 196      | + 6    | <i>Petroselinum crispum</i>      | part of a conserved DNA module involved in light responsiveness        |
|                    | ATTAAT         | 1037     | + 6    | <i>Petroselinum crispum</i>      | part of a conserved DNA module involved in light responsiveness        |
|                    | ATTAAT         | 1041     | + 6    | <i>Petroselinum crispum</i>      | part of a conserved DNA module involved in light responsiveness        |
|                    | ATTAAT         | 1720     | - 6    | <i>Petroselinum crispum</i>      | part of a conserved DNA module involved in light responsiveness        |
|                    | ATTAAT         | 2003     | - 6    | <i>Petroselinum crispum</i>      | part of a conserved DNA module involved in light responsiveness        |
|                    | ATTAAT         | 2068     | - 6    | <i>Petroselinum crispum</i>      | part of a conserved DNA module involved in light responsiveness        |
| G-Box              | CACGTG         | 1606     | - 6    | <i>Pisum sativum</i>             | <i>cis</i> -acting regulatory element involved in light responsiveness |
|                    | CAGACGTGGCA    | 1471     | - 10   | <i>Nicotiana plumbaginifolia</i> | <i>cis</i> -acting regulatory element involved in light responsiveness |
|                    | CACGTC         | 1474     | + 6    | <i>Zea mays</i>                  | <i>cis</i> -acting regulatory element involved in light responsiveness |
|                    | CACGTG         | 1606     | - 6    | <i>Arabidopsis thaliana</i>      | <i>cis</i> -acting regulatory element involved in light responsiveness |
|                    | TACGTG         | 1709     | + 6    | <i>Arabidopsis thaliana</i>      | <i>cis</i> -acting regulatory element involved in light responsiveness |
| GT1-motif          | GGTTAA         | 629      | - 6    | <i>Arabidopsis thaliana</i>      | light responsive element                                               |
| Box II             | TGGTAATAA      | 1956     | + 9    | <i>Solanum tuberosum</i>         | part of a light responsive element                                     |



**Table S6. Statistic of whole-genome bisulfite sequencing reads from peach fruit at different development stages and under UV-B treatment.**

| Sample  | Clean Reads | Clean Base  | Q20 (%) | Q30 (%) | GC Content (%) | Unique mapped Reads | Mapping rate (%) | BS Conversion Rate (%) |
|---------|-------------|-------------|---------|---------|----------------|---------------------|------------------|------------------------|
| S1      | 52228515    | 15625465236 | 97.57   | 94.33   | 22.25          | 34159457            | 65.40            | 99.55                  |
| S2      | 45297379    | 13511144752 | 97.49   | 94.10   | 22.08          | 29991889            | 66.21            | 99.57                  |
| S3      | 29082640    | 8671179212  | 97.22   | 93.55   | 21.85          | 19063507            | 65.55            | 99.49                  |
| S4      | 73842467    | 22084452994 | 97.64   | 94.65   | 21.27          | 49699965            | 67.31            | 99.53                  |
| S5      | 31362921    | 9373582598  | 96.47   | 92.02   | 21.55          | 20678550            | 65.93            | 99.51                  |
| Control | 47046165    | 13984776940 | 97.20   | 93.56   | 22.31          | 30512795            | 64.86            | 99.67                  |
| UV-B    | 39321501    | 11729996560 | 96.98   | 93.09   | 22.05          | 25050159            | 63.71            | 99.68                  |

**Table S7. Statistic of sequencing depth and covering in peach fruit at different development stages and under UV-B treatment.**

| Sample  | Average depth | Covering ratio | Covering ratio | Covering ratio |
|---------|---------------|----------------|----------------|----------------|
|         |               | 1×(%)          | 5×(%)          | 10×(%)         |
| S1      | 46            | 92.77          | 89.65          | 87.24          |
| S2      | 41            | 92.16          | 88.85          | 86.03          |
| S3      | 26            | 91.75          | 87.33          | 82.28          |
| S4      | 67            | 92.89          | 90.08          | 88.11          |
| S5      | 28            | 91.72          | 87.37          | 82.46          |
| Control | 41            | 93.07          | 90.15          | 87.69          |
| UV-B    | 33            | 92.95          | 89.62          | 86.41          |

**Table S8. Primers of TFs which homologues of transcription factors that regulate terpenoid formation.**

| Peach ID       | Name     | Primer-SK (5')                       | Primer-SK (3')                       |
|----------------|----------|--------------------------------------|--------------------------------------|
| Prupe.4G187100 | PpNAC1   | agaactagtggatccATGGAGAGCACCGACTCCTC  | cccctcgaggtcgacCTATCCCAAATTGGACTCAG  |
| Prupe.4G040900 | PpNAC2   | agaactagtggatccATGGAGAGCACAGATTCATC  | cccctcgaggtcgacCTATGAATTCCAATTCATAC  |
| Prupe.1G220400 | PpNAC4   | agaactagtggatccATGGAGAGGCTTAATTTTGT  | cccctcgaggtcgacCTACTGTTTTCTTCTAAAGT  |
| Prupe.5G196000 | PpNAC6   | agaactagtggatccATGGAACACGTTCCAGCTGG  | cccctcgaggtcgacTTAATAATTCCAAAAATTAT  |
| Prupe.1G493100 | PpNAC8   | agaactagtggatccATGTCGTCCTCCGATTTACA  | cccctcgaggtcgacTCAATACGGCTTCTGTAGGT  |
| Prupe.5G222400 | PpMYB1   | agaactagtggatccATGTCTAGTAATACTAAAAGC | cccctcgaggtcgacTTAGCTCCTACTTTGCCACA  |
| Prupe.8G164300 | PpMYB2   | agaactagtggatccATGGGAAGATCTCCTTGCTG  | cccctcgaggtcgacTCATTTTCATCTCCAAGCTTC |
| Prupe.2G237100 | PpMYB3   | agaactagtggatccATGGTGTGGAAGAAGAGGCT  | cccctcgaggtcgacTCAGCTCCATGTCTTATCAG  |
| Prupe.5G117000 | PpWRKY1  | agaactagtggatccATGGATTCTAGTAAGAGCTG  | cccctcgaggtcgacTTATGAGAAAATTCCTGTGG  |
| Prupe.1G393000 | PpWRKY2  | agaactagtggatccATGGACTCAGAATGGGTGAA  | cccctcgaggtcgacTCACCAATTTCCCATCCGAG  |
| Prupe.5G187800 | PpWRKY73 | agaactagtggatccATGGAGGCTGCTCTGGGAAA  | cccctcgaggtcgacCTATAAACTTTTGTGATCTC  |
| Prupe.6G295100 | PpWRKY45 | agaactagtggatccATGGAGTTGTCTTGGCCGGA  | cccctcgaggtcgacTCAAAATTCATATTGCAAAA  |
| Prupe.6G286000 | PpWRKY53 | agaactagtggatccATGACTTCCTCTTTCCTCA   | cccctcgaggtcgacTTAGAACTCTGGAATCCAT   |
| Prupe.6G230600 | PpWRKY76 | agaactagtggatccATGGCTGTAGATTTTATGGG  | cccctcgaggtcgacCTAAGACGATTCTAGAATGA  |
| Prupe.6G046900 | PpWRKY8  | agaactagtggatccATGGCCTCCTCTTCTGGGAG  | cccctcgaggtcgacTCAGCATAGCAATGATTCAA  |
| Prupe.1G431100 | PpWRKY3  | agaactagtggatccATGGCTGTGGAGCTCATGAT  | cccctcgaggtcgacTTAAGATGATTTCGAGGACGA |
| Prupe.6G295100 | PpWRKY4  | agaactagtggatccATGGAGTTGTCTTGGCCGGA  | cccctcgaggtcgacTCAAAATTCATATTGCAAAA  |
| Prupe.8G095700 | PpMYC1   | agaactagtggatccATGAACAGAGCGTTGCCGGA  | cccctcgaggtcgacTCACATCTCCATCTTTAAAT  |
| Prupe.5G035400 | PpMYC2   | agaactagtggatccATGACGGACTATCGGATACC  | cccctcgaggtcgacACCTCTTCTTCTTGCTGTTG  |
| Prupe.8G157500 | PpbHLH1  | agaactagtggatccATGGAGATTTTCGTCGATAGG | cccctcgaggtcgacTCACATGAACATGTGCAAAAG |
| Prupe.6G211900 | PpbHLH2  | agaactagtggatccATGGACATATCATCAGCCAA  | cccctcgaggtcgacTCACATGAACTTCAGCAGAG  |
| Prupe.7G207500 | PpbHLH25 | agaactagtggatccATGGACACTGCCTTCCAGCT  | cccctcgaggtcgacTCATTGATTGCGGCAATTAT  |
| Prupe.6G212000 | PpbHLH3  | agaactagtggatccATGGACATGATTTTCATCAGC | cccctcgaggtcgacTCACACAACTTGAGCAATG   |
| Prupe.5G143200 | PpbHLH4  | agaactagtggatccATGCTGCCTAGGCTGAACGG  | cccctcgaggtcgacCTATATCAAGCCATGGAACC  |
| Prupe.5G061800 | PpERF1   | agaactagtggatccATGTTCCGACAGAGTGGAAC  | cccctcgaggtcgacTCAGCTACTAATAACTGCT   |
| Prupe.2G272400 | PpERF2   | agaactagtggatccATGGCAACAGAGCATGAAGA  | cccctcgaggtcgacTTATGTAACCATAAGCTGAG  |
| Prupe.2G129400 | PpERF3   | agaactagtggatccATGTTAGGAGATGAAAAAAG  | cccctcgaggtcgacCTACTTCTTCGGTGAGCCAC  |

|                |          |                                     |                                     |
|----------------|----------|-------------------------------------|-------------------------------------|
| Prupe.1G037900 | PpEREB58 | agaactagtggatccATGAATTACTCAATCTTCCA | cccctcgaggtcgacTCAACGATTAGGTGTGGCAG |
| Prupe.3G104100 | PpAP2    | agaactagtggatccATGGCGAAAACCTCACAGCA | cccctcgaggtcgacTCAGGCATCAAGTTCACAAT |
| Prupe.2G058400 | PpEIL1   | agaactagtggatccATGGGGATCTTTGAAGAAAT | cccctcgaggtcgacTCAGATCCAAAATGCATCTT |
| Prupe.6G018200 | PpEIL3   | agaactagtggatccATGGGTGACGTTGAAGAGGT | cccctcgaggtcgacTTATGCCGCAAAGTATTCCA |
| Prupe.1G434500 | PpbZIP1  | agaactagtggatccATGGGTACCAACATGAACTT | cccctcgaggtcgacTTACCATGGACCGGTCTGCG |
| Prupe.1G307300 | PpbZIP2  | agaactagtggatccATGCAGAGCTTCAAAGCAGC | cccctcgaggtcgacTTAGTCCCTAGGACGTGCCA |
| Prupe.6G129100 | PpbZIP79 | agaactagtggatccATGGCTTTCATTTCTGCCAC | cccctcgaggtcgacTCAGAAGGATGAGAAGTGAT |
| Prupe.1G371500 | PpEOT1   | agaactagtggatccATGGCTGGCTTGTTTTGCTT | cccctcgaggtcgacTCAATCATAATCATCCTCTC |
| Prupe.7G245200 | PpYABBY5 | agaactagtggatccATGACCAGCTGCATCGATGT | cccctcgaggtcgacTCATTTATTCAGCAGTGCAG |

Lowercase letters indicate sequences on the vector.

**Table S9. Other primer sequences used in the present study.**

| Primers                     | Sequence (5'→3')                                  | Description                                          |
|-----------------------------|---------------------------------------------------|------------------------------------------------------|
| pET- <i>PpTPS3</i> -FP      | aaggcctctgtcgacATGGCCCTTCTTCAAGCTCA               | pET vector cloning of <i>PpTPS3</i>                  |
| pET- <i>PpTPS3</i> -RP      | agaattcgaagcttTATTTTCGTCTGGCCTGGGG                | pET vector cloning of <i>PpTPS3</i>                  |
| SK- <i>PpTPS3</i> -FP       | agaactagtggatccATGGCCCTTCTTCAAGCTCA               | pGreen-SK vector cloning of <i>PpTPS3</i>            |
| SK- <i>PpTPS3</i> -RP       | cccctcgaggtcgacTATTTTCGTCTGGCCTGGGG               | pGreen-SK vector cloning of <i>PpTPS3</i>            |
| pBII21- <i>PpTPS3</i> -FP   | acgggggactctagaATGGCCCTTCTTCAAGCTCA               | pBII21 vector cloning of <i>PpTPS3</i>               |
| pBII21- <i>PpTPS3</i> -RP   | accacccggggatccTTTCGTCTGGCCTGGGGACT               | pBII21 vector cloning of <i>PpTPS3</i>               |
| eGFP- <i>PpTPS3</i> -FP     | ggtacccggggatccATGGCCCTTCTTCAAGCTCA               | 35S-eGFP vector cloning of <i>PpTPS3</i>             |
| eGFP- <i>PpTPS3</i> -RP     | gctcacatgtcgacTTTCGTCTGGCCTGGGGACT                | 35S-eGFP vector cloning of <i>PpTPS3</i>             |
| LUC-Pro <i>PpTPS3</i> -FP   | ggtatcgataagcttAAGATAGAAGTCAGCTGGAA               | pGreen-LUC vector cloning of <i>PpTPS3</i> promoter  |
| LUC-Pro <i>PpTPS3</i> -RP   | tggcgtcttccatggGTCGTTAATATGCCGAGTAT               | pGreen-LUC vector cloning of <i>PpTPS3</i> promoter  |
| LUC-Pro <i>PpTPS1</i> -FP   | ggtatcgataagcttACCGGCCTAAATAACTAGAT               | pGreen-LUC vector cloning of <i>PpTPS1</i> promoter  |
| LUC-Pro <i>PpTPS1</i> -RP   | tggcgtcttccatggTTTTACTAGAGCAATTGCAG               | pGreen-LUC vector cloning of <i>PpTPS1</i> promoter  |
| LUC-Pro <i>NtLIS</i> -FP    | ggtatcgataagcttAGTCAAATTTGATCCTTTTC               | pGreen-LUC vector cloning of <i>NtLIS</i> promoter   |
| LUC-Pro <i>NtLIS</i> -RP    | tggcgtcttccatggGTA AAAAGATTATTTTGCTGT             | pGreen-LUC vector cloning of <i>NtLIS</i> promoter   |
| LUC-Pro <i>AtTPS10</i> -FP  | ggtatcgataagcttTCTCACTTTGGTTTTCCAAC               | pGreen-LUC vector cloning of <i>AtTPS10</i> promoter |
| LUC-Pro <i>AtTPS10</i> -RP  | tggcgtcttccatggATTGAATAAATGTATTATTA               | pGreen-LUC vector cloning of <i>AtTPS10</i> promoter |
| pAbAi-Pro <i>PpTPS3</i> -FP | tgaattgaaaagcttAAGATAGAAGTCAGCTGGAA               | pAbAi vector cloning of <i>PpTPS3</i> promoter       |
| pAbAi-Pro <i>PpTPS3</i> -RP | cgacagatccccgggGTCGTTAATATGCCGAGTAT               | pAbAi vector cloning of <i>PpTPS3</i> promoter       |
| AD- <i>PpbHLH1</i> -FP      | gaggccagtgaattcATGGAGATTTTCGTTCGATAGG             | pGADT7 vector cloning of <i>PpbHLH1</i>              |
| AD- <i>PpbHLH1</i> -RP      | gagctcgatggatccTCACATGAACATGTTCGAAAG              | pGADT7 vector cloning of <i>PpbHLH1</i>              |
| pGEX- <i>PpbHLH1</i> -FP    | gttccgcgtggatccATGGAGATTTTCGTTCGATAGG             | pGEX-4T-1 vector cloning of <i>PpbHLH1</i>           |
| pGEX- <i>PpbHLH1</i> -RP    | tcgacccgggaattcTCACATGAACATGTTCGAAAG              | pGEX-4T-1 vector cloning of <i>PpbHLH1</i>           |
| eGFP- <i>PpbHLH1</i> -FP    | ggtacccggggatccATGGAGATTTTCGTTCGATAGG             | 35S-eGFP vector cloning of <i>PpbHLH1</i>            |
| eGFP- <i>PpbHLH1</i> -RP    | gctcacatgtcgacCATGAACATGTTCGAAAGCAG               | 35S-eGFP vector cloning of <i>PpbHLH1</i>            |
| pBII21- <i>PpbHLH1</i> -FP  | acgggggactctagaATGGAGATTTTCGTTCGATAGG             | pBII21 vector cloning of <i>PpbHLH1</i>              |
| pBII21- <i>PpbHLH1</i> -RP  | accacccggggatccCATGAACATGTTCGAAAGCAG              | pBII21 vector cloning of <i>PpbHLH1</i>              |
| attB1- <i>PpbHLH1</i> -FP   | ggggacaagttgtacaaaaagcaggctATGGAGATTTTCGTTCGATAGG | pBIN19-E8 vector cloning of <i>PpbHLH1</i>           |

|                           |                                                   |                                                 |
|---------------------------|---------------------------------------------------|-------------------------------------------------|
| attB2- <i>PpbHLH1</i> -RP | ggggaccactttgtacaagaagctgggtCATGAACATGTGCGAAAGCAG | pBIN19-E8 vector cloning of <i>PpbHLH1</i>      |
| Probe1-FP-biotin          | TGAAATGATGATAAGCACATGGATATATGGCCTGGAAAAC          | Probe for EMSA                                  |
| Probe1-RP-biotin          | GTTTTCCAGGCCATATATCCATGTGCTTATCATCATTTCA          | Probe for EMSA                                  |
| Probe2-FP-biotin          | GGTTGGTACGACCACGTGAAATTACGTTATGGTATTTTCGT         | Probe for EMSA                                  |
| Probe2-RP-biotin          | ACGAAATACCATAACGTAATTTACGTGGTCGTACCAACC           | Probe for EMSA                                  |
| Probe3-FP-biotin          | ATCAATCCTTTCAAGCGGACAATCACATGATGCGTCGTCG          | Probe for EMSA                                  |
| Probe3-RP-biotin          | CGACGACGCATCATGTGATTGTCCGCTTGAAAGGATTGAT          | Probe for EMSA                                  |
| Probe1-FP                 | TGAAATGATGATAAGCACATGGATATATGGCCTGGAAAAC          | Probe for EMSA                                  |
| Probe1-RP                 | GTTTTCCAGGCCATATATCCATGTGCTTATCATCATTTCA          | Probe for EMSA                                  |
| Mutant-Probe1-FP-biotin   | TGAAATGATGATAAGAGTGGAGATATATGGCCTGGAAAAC          | Probe for EMSA                                  |
| Mutant-Probe1-FP-biotin   | GTTTTCCAGGCCATATATCTCCACTCTTATCATCATTTCA          | Probe for EMSA                                  |
| TRV2- <i>PpPDS</i> -FP    | tgcccgggctcgagATGTCTCAGTGGGCTTGTGT                | pTRV2 vector cloning of <i>PpPDS</i> for VIGS   |
| TRV2- <i>PpPDS</i> -RP    | cctccatgggatccCTCTTGCTTCCAGTAAGATA                | pTRV2 vector cloning of <i>PpPDS</i> for VIGS   |
| TRV2- <i>PpTPS3</i> -FP   | tgcccgggctcgagTACATAATAGATGATATTTT                | pTRV2 vector cloning of <i>PpTPS3</i> for VIGS  |
| TRV2- <i>PpTPS3</i> -RP   | cctccatgggatccTTGGTTCTCATCCTTGGCAC                | pTRV2 vector cloning of <i>PpTPS3</i> for VIGS  |
| TRV2- <i>PpbHLH1</i> -FP  | tgcccgggctcgagACACTTGAGGAACAGACCAG                | pTRV2 vector cloning of <i>PpbHLH1</i> for VIGS |
| TRV2- <i>PpbHLH1</i> -RP  | cctccatgggatccTTGACAAGTTCCTTCACTGA                | pTRV2 vector cloning of <i>PpbHLH1</i> for VIGS |
| qPCR- <i>PpTPS3</i> -FP   | GGTCGCGGTATAACTCAGCA                              | RT-qPCR of <i>PpTPS3</i>                        |
| qPCR- <i>PpTPS3</i> -RP   | CAAAGTCATCCCAGAGCCGT                              | RT-qPCR of <i>PpTPS3</i>                        |
| qPCR- <i>PpbHLH1</i> -FP  | CCCCTTTGAGGAGACTGC                                | RT-qPCR of <i>PpbHLH1</i>                       |
| qPCR- <i>PpbHLH1</i> -RP  | TGTCGAAAGCAGAGCGTAGA                              | RT-qPCR of <i>PpbHLH1</i>                       |
| qPCR- <i>AtTPS10</i> -FP  | ATCGTACAAGCTATTCATCAAGAGGAACT                     | RT-qPCR of <i>AtTPS10</i>                       |
| qPCR- <i>AtTPS10</i> -RP  | ACCTAAACCTGTCTCCATCCACC                           | RT-qPCR of <i>AtTPS10</i>                       |
| qPCR- <i>AtTPS14</i> -FP  | GTCATTGACTCAAGGAGAAATGTCTCAAAC                    | RT-qPCR of <i>AtTPS14</i>                       |
| qPCR- <i>AtTPS14</i> -RP  | GCTTCTTGCCTTCTCCACATCTTT                          | RT-qPCR of <i>AtTPS14</i>                       |
| qPCR- <i>SITPS5</i> -FP   | CTTCGGATGAACTGAAAAGAGG                            | RT-qPCR of <i>SITPS5</i>                        |
| qPCR- <i>SITPS5</i> -RP   | GTGGAGAATTTTTGCTTTGAGC                            | RT-qPCR of <i>SITPS5</i>                        |
| qPCR- <i>NtLIS</i> -FP    | ATGGATGGGGAAGAAGCACC                              | RT-qPCR of <i>NtLIS</i>                         |
| qPCR- <i>NtLIS</i> -RP    | CGGCTTCTGTGAAGAGGGTT                              | RT-qPCR of <i>NtLIS</i>                         |

---

|                    |                          |                                              |
|--------------------|--------------------------|----------------------------------------------|
| <i>PpTEF2</i> -FP  | GGTGTGACGATGAAGAGTGATG   | RT-qPCR of house-keeping gene <i>PpTEF</i>   |
| <i>PpTEF2</i> -RP  | TGAAGGAGAGGGAAGGTGAAAG   | RT-qPCR of house-keeping gene <i>PpTEF</i>   |
| <i>AtEF1α</i> -FP  | TGAGCACGCTCTTCTTGCTTTCA  | RT-qPCR of house-keeping gene <i>AtEF1α</i>  |
| <i>AtEF1α</i> -RP  | GGTGGTGGCATCCATCTTGTTACA | RT-qPCR of house-keeping gene <i>AtEF1α</i>  |
| <i>SlActin</i> -FP | TGTCCCTATTTACGAGGGTTATGC | RT-qPCR of house-keeping gene <i>SlActin</i> |
| <i>SlActin</i> -RP | CAGTTAAATCACGACCAGCAAGAT | RT-qPCR of house-keeping gene <i>SlActin</i> |
| <i>NtEF1-α</i> -FP | GCCCAACTTCTTGATGCTC      | RT-qPCR of house-keeping gene <i>NtEF1</i>   |
| <i>NtEF1-α</i> -RP | GACACCAGTTTCCACACGAC     | RT-qPCR of house-keeping gene <i>NtEF1</i>   |

---

Lowercase letters indicate sequences on the vector.
